# Supplementary material
Source: Springer Nature journal article supplement (https://www.springermedizin.de/resource/supplementary/12890_2011_293_MOESM1_ESM.pdf/9504902)

# Hazard function of death

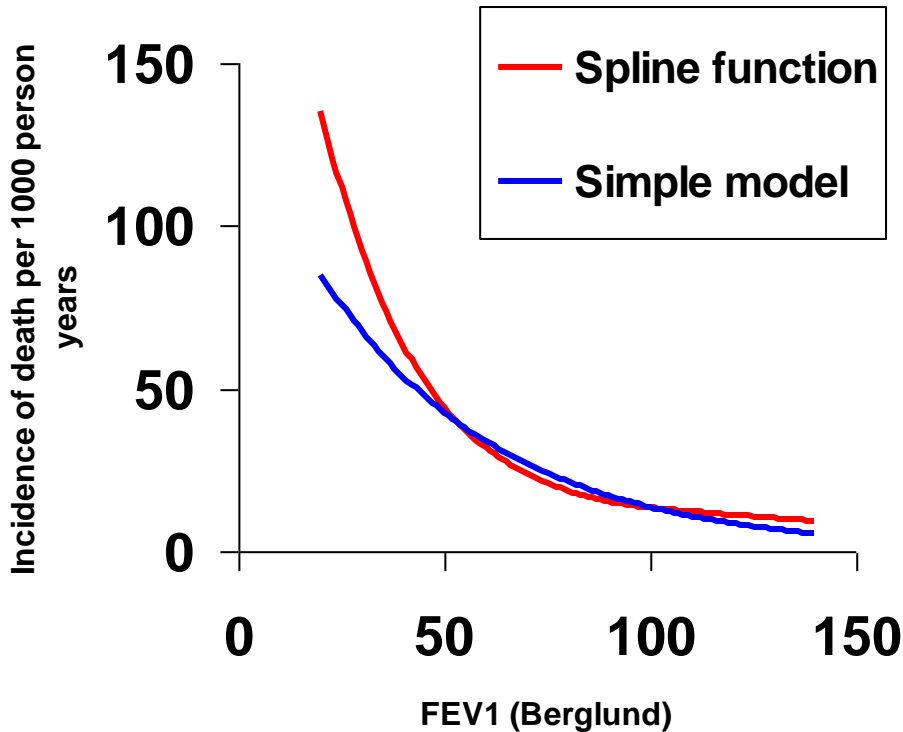

Supplement: MOESM1 [file 9504902]
